# Supplementary material for: Aldol condensation-polymerized semiconducting polymers based on a BDOPV unit with near infrared absorption and better n-doped ability
Source: Royal Society of Chemistry journal article supplement (doi:10.1039/d3ma00073g), 2023-01-01
Supplement: d3ma00073g1.pdf [file d3ma00073g1.pdf]

## Support information

### Aldol Condensation-Polymerized Semiconducting Polymers Based on BDOPV Unit with Near Infrared Absorption and Better n-Doped Ability

*Li Tian, <sup>\*a</sup> Airong Wang, <sup>b</sup> Haowei Lin, <sup>a</sup> Wenxi Cheng, <sup>a</sup> Mengya Shang, <sup>a</sup> Shanhong Xu, <sup>a</sup> Xuefei Zhou<sup>a</sup>.*

<sup>a</sup> School of Materials Science and Engineering, Henan University of Technology, Zhengzhou 450001, P.R. China

<sup>b</sup> School of Chemistry and Chemical Engineering, Henan Institute of Science and Technology, Xinxiang 453003, China.

Li Tian \* e-mail: [tianli@haut.edu.cn](mailto:tianli@haut.edu.cn),

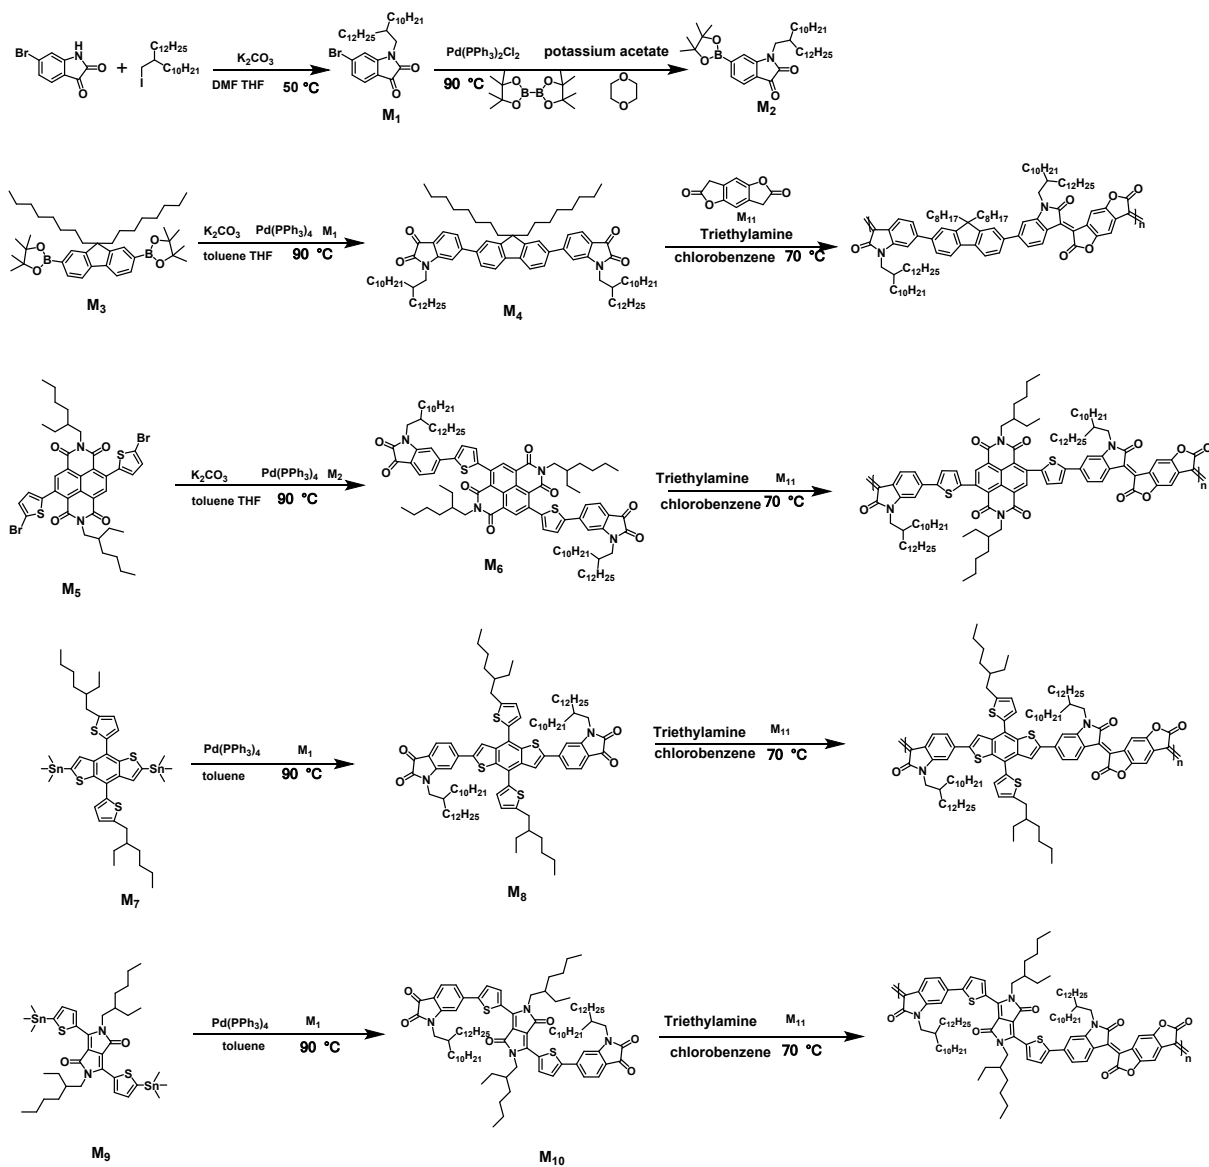

## Experimental section:

### Scheme S1 Synthetic procedures of monomers and polymers.

6-Bromoisatin (97%), triethylamine (99.5%), iodomethane (99.5%), bromoethane (99.5%) and tetrahydrofuran (99.5%) were purchased from Energy Chemical and used directly without further treatment. 3,7-dihydrobenzo[1,2-b:4,5-b']difuran-2,6-dione (M6) (98%) was purchased from COSPAR industry (China) Co. Ltd. Chlorobenzene (99.5%) and Pd(PPh<sub>3</sub>)<sub>4</sub> were purchased from

Acros Co. Ltd. 6,6'-(2,7-bis(4,4,5,5-tetramethyl-1,3,2-dioxaborolan-2-yl)-9H-fluorene-9,9-diyl)bis(N,N-diethylhexan-1-amine),<sup>[1]</sup> M1<sup>[2]</sup> and M2<sup>[3]</sup> were synthesized according to the published literatures. The synthetic steps of monomers are presented in **Scheme S1**.

**6,6'-(9,9-dioctyl-9H-fluorene-2,7-diyl)bis(1-(2-decyltetradecyl)indoline-2,3-dione) (M4)**

Toluene (12 mL), M1(1.1 g, 1.96 mmol) and 2,2'-(9,9-dioctyl-9H-fluorene-2,7-diyl)bis(4,4,5,5-tetramethyl-1,3,2-dioxaborolane) (M3) (0.53 g, 0.82 mmol) were added to a 50 mL of flask. Then potassium carbonate (2.0 M aqueous solution, 6 mL) and THF (4 mL) were added. The reaction was then purged with argon for 20 min, then Pd(PPh<sub>3</sub>)<sub>4</sub> (5 mg) was added. The mixture was then stirred under 90°C overnight. The orange mixture was extracted with dichloromethane and water, washed by water for two times. The organic phase was then dried with anhydrous MgSO<sub>4</sub>, and was evaporated under vacuum to obtain the crude product. After purifying by column chromatography with petroleum ether/dichloromethane (1:1) as eluent, the pure product (M2) was obtained as orange oil with a yield of 87%.

<sup>1</sup>H NMR (500 MHz, CDCl<sub>3</sub>) δ = 7.86 (d, *J*=7.9, 2H), 7.71 (d, *J*=7.8, 2H), 7.63 (dd, *J*=7.9, 1.5, 2H), 7.60 (s, 2H), 7.40 (dd, *J*=7.8, 1.0, 2H), 7.12 (s, 2H), 3.70 (d, *J*=7.3, 4H), 2.12-2.04 (m, 4H), 1.98-1.91 (m, 2H), 1.41-1.06 (m, 100H), 0.87 (t, *J*=6.9, 12H), 0.78 (t, *J*=7.1, 6H), 0.72 (s, 4H).

**4,9-bis(5-(1-(2-decyltetradecyl)-2,3-dioxindolin-6-yl)thiophen-2-yl)-2,7-bis(2-ethylhexyl)benzo [3,8]phenanthroline-1,3,6,8(2H,7H)-tetraone (M6)**

Toluene (3 mL), M2 (217 mg, 0.36 mmol) and 4,9-bis(5-bromothiophen-2-yl)-2,7-bis(2-ethylhexyl)benzo [3,8]phenanthroline-1,3,6,8(2H,7H)-tetraone (M5) (100 mg, 0.16 mmol) were added to a 15 mL of pressure tubes. Then potassium carbonate (2.0 M aqueous solution, 2 mL) and THF (1 mL) were added. The reaction was then purged with argon for 20 min, then Pd(PPh<sub>3</sub>)<sub>4</sub> (5 mg) was added. The mixture was then stirred under 90°C overnight. The orange mixture was

extracted with dichloromethane and water, washed by water for two times. The organic phase was then dried with anhydrous MgSO<sub>4</sub>, and was evaporated under vacuum to obtain the crude product. After purifying by column chromatography (SiO<sub>2</sub>; PE/DCM =1:1), the pure product (M6) was obtained as orange oil with a yield of 87%.

<sup>1</sup>H NMR (400 MHz, CDCl<sub>3</sub>) δ =8.82 (s, 2H), 7.66 (d, *J*=7.8, 2H), 7.57 (d, *J*=3.8, 2H), 7.39 (d, *J*=7.9, 2H), 7.36 (d, *J*=3.8, 2H), 7.13 (s, 2H), 4.11 (dd, *J*=7.1, 4.3, 4H), 3.67 (d, *J*=7.3, 4H), 1.91 (d, *J*=6.2, 4H), 1.40-1.35 (m, 16H), 1.31-1.17 (m, 80H), 0.92-0.83 (m, 24H).

**6,6'-(4,8-bis(5-(2-ethylhexyl)thiophen-2-yl)benzo[1,2-b:4,5-b']dithiophene-2,6-diyl)bis(1-(2-decyltetradecyl)indoline-2,3-dione) (M8)**

Toluene (5 mL), M1 (202 mg, 0.36 mmol) and M7 (145 mg, 0.16 mmol) were added to a 10 mL of pressure tubes. The reaction was then purged with argon for 20 min, then Pd(PPh<sub>3</sub>)<sub>4</sub> (5 mg) was added. The mixture was then stirred under 90°C overnight. The orange mixture was extracted with dichloromethane and water, washed by water for two times. The organic phase was then dried with anhydrous MgSO<sub>4</sub>, and was evaporated under vacuum to obtain the crude product. After purifying by column chromatography (SiO<sub>2</sub>; PE/DCM =1:1), the pure product (M8) was obtained as orange oil with a yield of 90%.

<sup>1</sup>H NMR (400 MHz, CDCl<sub>3</sub>), δ=8.92 (d, 2H, *J*=3.9 Hz), 7.46 (d, *J*=7.9, 2H) 7.30 (d, *J*=4.3 Hz, 2H), 7.27 (dd, *J*=7.9, 1.5, 2H), 7.02 (d, *J*=1.4, 2H), 4.13-3.98 (m, 4H), 3.57 (d, *J*=7.5, 4H), 1.89 (p, *J*= 6.3 Hz, 2H), 1.83 (s, 2H), 1.43-1.15 (m, 96H), 0.89 (dt, *J*= 9.1, 7.1 Hz, 12H), 0.88 (t, *J*=6.8, 12H)

**6,6'-((2,5-bis(2-ethylhexyl)-3,6-dioxo-2,3,5,6-tetrahydropyrrolo[3,4-c]pyrrole-1,4-diyl)bis(thiophene-5,2-diyl))bis(1-(2-decyltetradecyl)indoline-2,3-dione) (M10)**

Toluene (5 mL), M1 (151.5 mg, 0.27 mmol) and M9 (102.2 mg, 0.12 mmol) were added to a 10 mL of pressure tubes. The reaction was then purged with argon for 15 min, then Pd(PPh<sub>3</sub>)<sub>4</sub> (5 mg) was added. The mixture was then stirred under 90°C overnight. The blue mixture was extracted with dichloromethane and water, washed by water for two times. The blue phase was then dried with anhydrous MgSO<sub>4</sub>, and was evaporated under vacuum to obtain the crude product. After purifying by column chromatography (SiO<sub>2</sub>; PE/DCM = 1:2), the pure product (M10) was obtained as blue solid with a yield of 90%.

<sup>1</sup>H NMR (400 MHz, CDCl<sub>3</sub>) δ=7.64 (d, *J*=5.7 Hz, 2H), 7.46 (d, *J*=7.9, 2H), 7.29 (d, *J*=3.4 Hz, 2H), 7.27 (dd, *J*=7.9, 1.5, 2H), 7.02 (d, *J*=1.4, 2H), 6.89 (d, *J*=3.5 Hz, 2H), 3.57 (d, *J*=7.5, 4H), 2.86 (d, *J*=6.8 Hz, 4H), 1.83 (s, 2H), 1.73-1.64 (m, 2H), 1.43-1.15 (m, 96H), 1.05-0.88 (m, 12H), 0.84 (t, *J*=6.8, 12H).

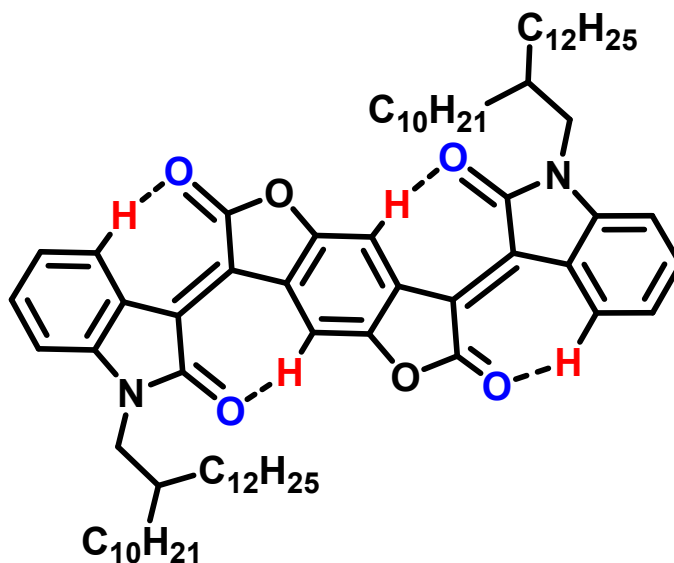

**Figure S1** The diagram of hydrogen bonds in BDOPV unit

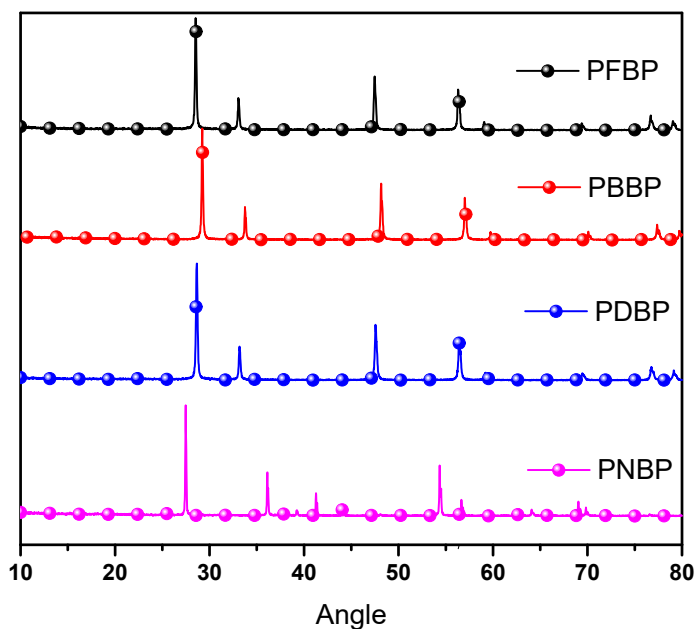

**Figure S2** XRD spectra of BCF doped PFBP(a); PBBP(b); PDBP(c); PNBP(d) films

**Table S1.** Electron/hole mobilities of pure narrow-bandgap semiconducting polymers and polymers:PTB7-Th blend electron/hole-only devices

| Acceptor |                | $\mu_e(\text{cm}^2\text{V}^{-1}\text{s}^{-1})$ | $\mu_h(\text{cm}^2\text{V}^{-1}\text{s}^{-1})$ |
|----------|----------------|------------------------------------------------|------------------------------------------------|
| PBBP     | Blend(PTB7-Th) | $1.012 \times 10^{-7}$                         | $5.820 \times 10^{-4}$                         |
|          | pure           | $1.157 \times 10^{-7}$                         | $4.565 \times 10^{-5}$                         |
| PNBP     | Blend(PTB7-Th) | $2.228 \times 10^{-8}$                         | $1.529 \times 10^{-4}$                         |
|          | pure           | $3.514 \times 10^{-4}$                         | $1.750 \times 10^{-4}$                         |
| PDBP     | Blend(PTB7-Th) | $2.067 \times 10^{-8}$                         | $9.047 \times 10^{-4}$                         |
|          | pure           | $4.607 \times 10^{-6}$                         | $1.465 \times 10^{-5}$                         |
| PFBP     | Blend(PTB7-Th) | $1.459 \times 10^{-7}$                         | $3.150 \times 10^{-3}$                         |

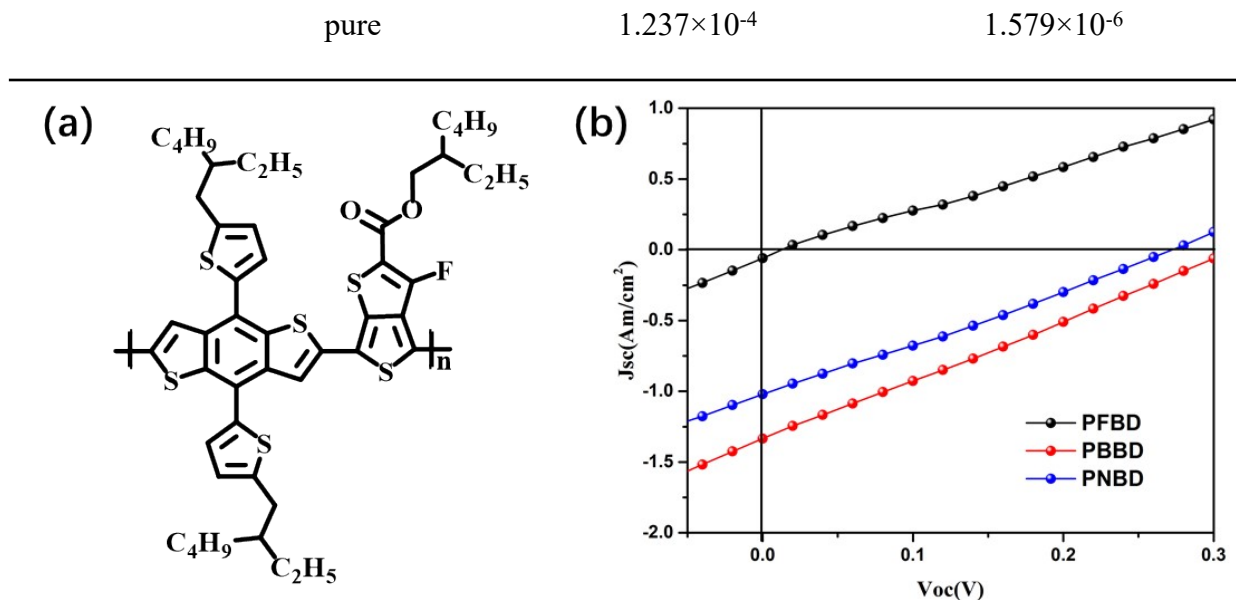

**Figure S3** Chemical structures of PTB7-Th (a); J-V curves of devices based on PFBD, PBBP, PDBP and PNBP(b);

| Acceptor | $V_{oc}$ (V) | $J_{sc}$ (mA/cm <sup>2</sup> ) | $FF$       | PCE(%)    | PCE<br>(max%) |
|----------|--------------|--------------------------------|------------|-----------|---------------|
| PFBD     | 0.01±0.00    | 0.06±0.00                      | 0.00±0.00  | 0.00±0.00 | 0             |
| PBBP     | 0.29±0.03    | 1.39±0.08                      | 26.20±0.00 | 0.11±0.00 | 0.11          |
| PNBP     | 0.27±0.00    | 0.97±0.07                      | 27.38±0.52 | 0.07±0.00 | 0.08          |

**Table S2.** Device parameters of photovoltaic devices based on PTB7-Th: acceptor.

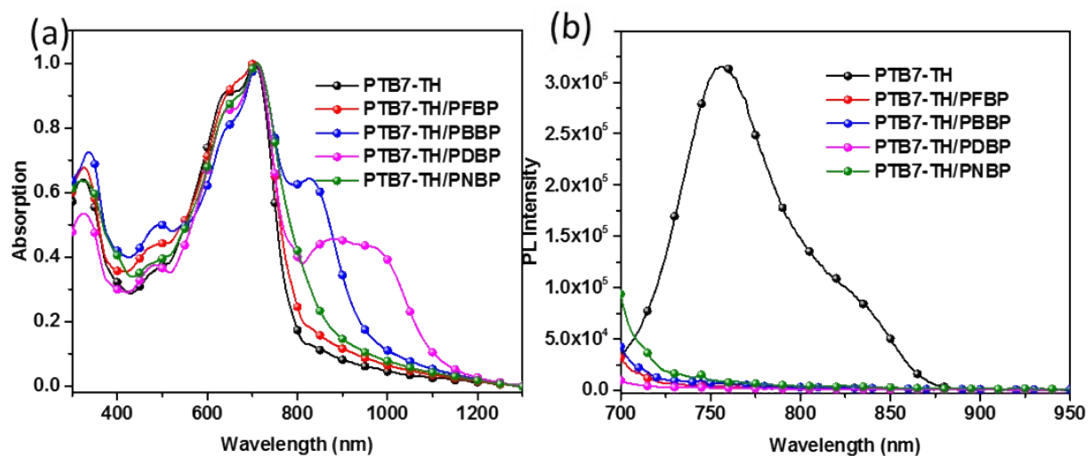

**Figure S4** UV-vis absorption spectra (a) and steady state PL spectra (b) for PTB7-Th and PTB7-Th/polymers blend films

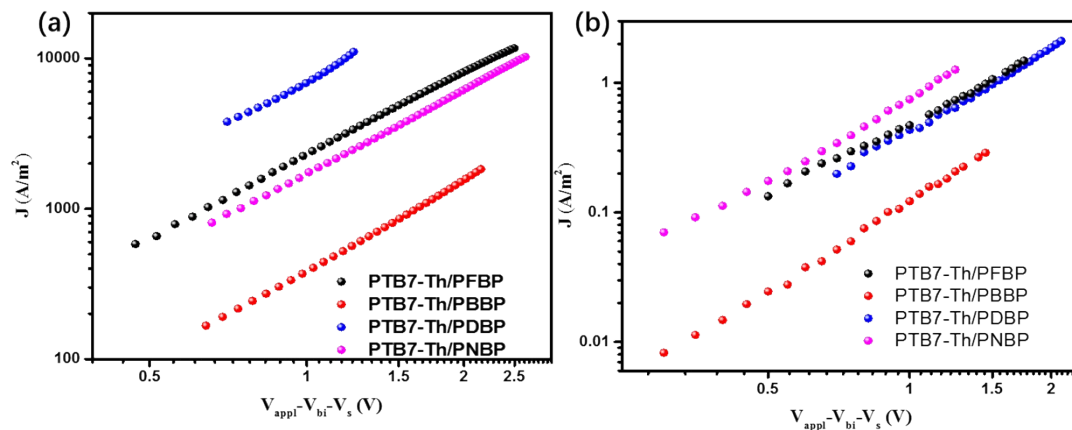

**Figure S5** The J-V curves of (a) electron-only devices with structure of ITO/ZnO/polymers:PTB7-TH/Ag; (b) hole-only devices with structure of ITO/PEDOT:PSS/polymers:PTB7-TH /MoO<sub>3</sub>/Ag for semiconducting polymer films;



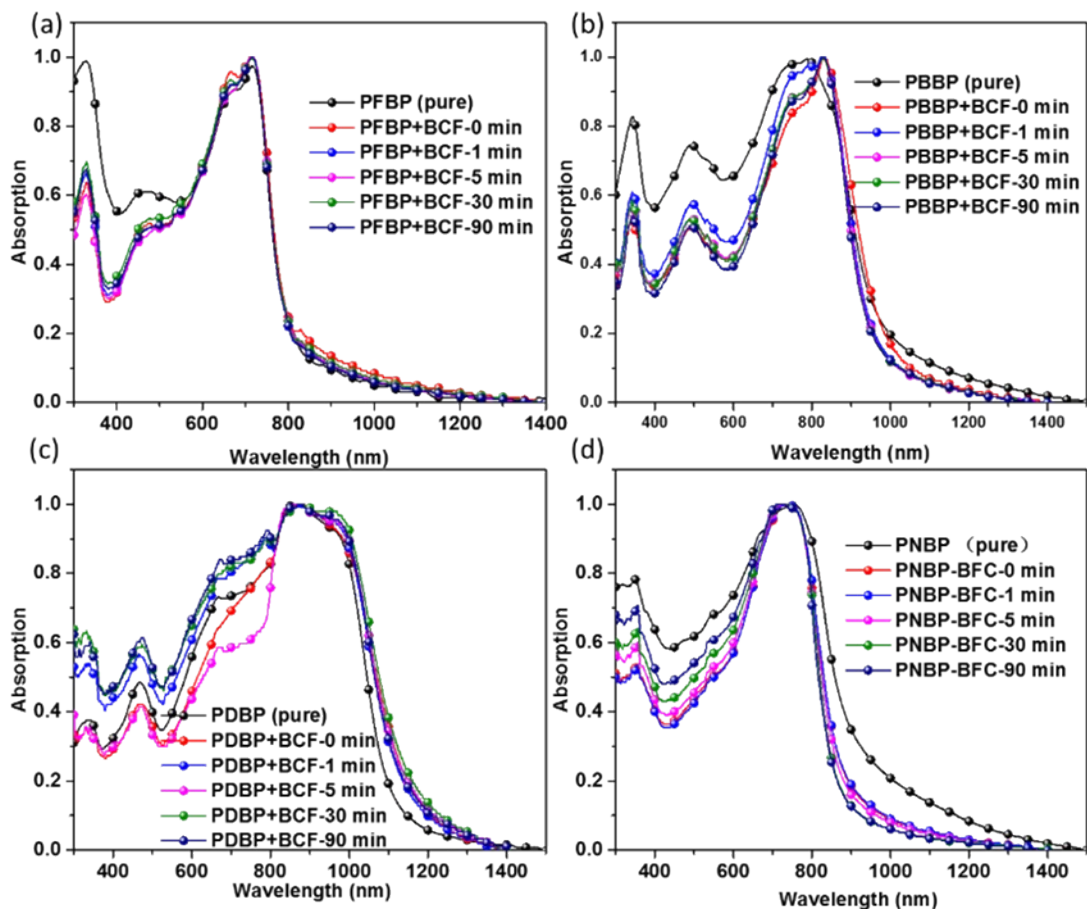

**Figure S6** UV-vis absorption spectra of BCF doped PFBP(a); PBBP(b); PDBP(c); PNBP(d) films after thermal annealing at 120°C for different time;

### Reference:

1. C. Duan, L. Wang, K. Zhang, X. Guan, F. Huang, *Adv. Mater.* **2011**, *23*, 1665-1669.
2. J.-H. Dou, Y.-Q. Zheng, T. Lei, S.-D. Zhang, Z. Wang, W.-B. Zhang, J.-Y. Wang, J. Pei, *Adv. Funct. Mater.* **2014**, *24*, 6270-6278.
3. H. Liao, C. Xiao, M. K. Ravva, Y. Wang, M. Little, M. V. C. Jenart, A. Onwubiko, Z. Li, Z. Wang, J.-L. Brédas, I. McCulloch, W. Yue, *Chem. Commun.*, **2018**, *54*, 11152-11155
